# Supplementary material
Source: publisher site journal article supplement (https://www.spandidos-publications.com/7562/downloadSupplementary)
Supplement: Supplementary file [file downloadSupplementary]

Table SI. Classification and characteristics of imaging guidance equipment.

| Category                         | Imaging principle                                                                                                       | Clinical applications                                                        | Advantages                                                     | Disadvantages                                                                                     | Contributions                                                                                                                                          |
|----------------------------------|-------------------------------------------------------------------------------------------------------------------------|------------------------------------------------------------------------------|----------------------------------------------------------------|---------------------------------------------------------------------------------------------------|--------------------------------------------------------------------------------------------------------------------------------------------------------|
| Electronic portal imaging device | Utilizes MV energy for position verification via electronic portal imaging (such as Varian TrueBeam)                    | Position verification, field verification and real-time dose monitoring (37) | Integrated on every linac and fast                             | High imaging dose and susceptible to interference from metallic objects                           | Serves as a basic positional check (37)                                                                                                                |
| CBCT                             | Utilizes kV or MV X-rays to acquire high-resolution 3D images through CBCT (such as Varian TrueBeam and Elekta Synergy) | Daily setup verification and intrafraction monitoring (39)                   | Fast imaging speed, high resolution and low radiation exposure | Requires regular quality assurance and accurate alignment of imaging and treatment beams required | Allows identification of anatomical changes over treatment; and shrinks residual setup error to ~2 mm, allowing PTV margin reduction of 30-50% (44,45) |

|         |                                                                                                                          |                                                                                                        |                                                                                                   |                                                                           |                                                                                                                                                                                                               |
|---------|--------------------------------------------------------------------------------------------------------------------------|--------------------------------------------------------------------------------------------------------|---------------------------------------------------------------------------------------------------|---------------------------------------------------------------------------|---------------------------------------------------------------------------------------------------------------------------------------------------------------------------------------------------------------|
| 4D CBCT | Uses time-resolved CBCT imaging to capture multi-phase images throughout the respiratory cycle (such as Varian TrueBeam) | Daily setup verification and intrafraction monitoring, and used for respiratory motion management (22) | Can track tumor motion throughout the entire respiratory cycle and improves localization accuracy | Higher imaging dose and requires additional hardware and software support | Enhances accuracy for mobile tumors by reducing motion blur; cuts registration uncertainty by a further 1.4 mm; and permits individual ITV reductions of 25-35% for tumors with $\geq 1$ cm motion (22,26,46) |
| FBCT    | Employs narrow-beam X-rays for thin-slice scanning to minimize scatter effects (such as uRT-linac 506C)                  | Provides precise electron density values for dose calculations (47)                                    | High resolution, low artifact sensitivity and improves dose                                       | Higher radiation exposure and costly equipment                            | Improves dose-calculation accuracy to within $\pm 1\%$ (47)                                                                                                                                                   |

|                                     |                                                                                                   |                                                                                     |                                                                              |                                                                                                                                   |                                                                                                                                           |
|-------------------------------------|---------------------------------------------------------------------------------------------------|-------------------------------------------------------------------------------------|------------------------------------------------------------------------------|-----------------------------------------------------------------------------------------------------------------------------------|-------------------------------------------------------------------------------------------------------------------------------------------|
|                                     |                                                                                                   |                                                                                     | calculation<br>accuracy                                                      |                                                                                                                                   |                                                                                                                                           |
| kV X-ray<br>stereoscopic<br>Imaging | Utilizes X-ray images from<br>multiple angles to generate<br>3D images (such as<br>CyberKnife)    | Continuous/periodic<br>intrafraction target<br>tracking (40)                        | Provides 3D<br>images and<br>enhances depth<br>visualization of the<br>tumor | Requires either visible<br>tumor or implanted<br>markers; high cost; and<br>increases radiation<br>exposure                       | Key to real-time<br>tumor tracking in<br>CyberKnife, and<br>enables margins as<br>small as 2-3 mm with<br>local control ~95%<br>(48,49)   |
| Fluoroscopy<br>imaging              | Utilizes 2D X-ray (kV/MV)<br>to generate real-time<br>dynamic images (such as<br>Varian TrueBeam) | Real-time guidance<br>for tumor<br>localization and<br>treatment monitoring<br>(38) | Direct observation<br>of motion and<br>integrated with<br>gating             | Lack of depth<br>information; ambiguous<br>if the tumor overlaps<br>other structures in<br>projection; and high<br>radiation dose | Aids in verifying<br>motion during gating<br>and tracking, and<br>improves<br>intrafraction<br>accuracy, reducing<br>geographic miss (38) |

|                                            |                                                                                                                                       |                                                                                        |                                                                                    |                                                                                                          |                                                                                                |
|--------------------------------------------|---------------------------------------------------------------------------------------------------------------------------------------|----------------------------------------------------------------------------------------|------------------------------------------------------------------------------------|----------------------------------------------------------------------------------------------------------|------------------------------------------------------------------------------------------------|
| Optical surface monitoring system          | Utilizes optical cameras to create 3D surface map, detecting sub-mm shifts and respiratory motion (such as AlignRT)                   | Real-time monitoring of patient posture and respiratory motion during radiotherapy(41) | No additional radiation exposure, easy to use and compatible with multiple systems | Provides only surface data, and sensitive to lighting and environmental conditions                       | Reduces interfractional set-up error with mean values of <5 mm and <0.5° in all directions(41) |
| Electromagnetic navigation tracking system | Percutaneous/bronchoscopic gold marker implantation, tracked via X-ray/EM signals (such as Calypso)                                   | Real-time tumor position tracking (42)                                                 | No imaging dose and true 3D internal target                                        | Invasive implantation, risk of migration and expensive                                                   | Offers sub-mm real-time tracking, and improves tumor control with low toxicity (42)            |
| MRI-guided Systems                         | Integrates MRI with linear accelerators to provide real-time high-quality soft tissue imaging during treatment (such as Elekta Unity) | Daily on-line adaptation and real-time soft-tissue gating (43)                         | Excellent soft tissue contrast, adaptive planning and no ionizing                  | Complex equipment, high cost, long session times and unsuitable for patients with pacemakers or metallic | Real-time tumor gating and daily adaptive planning improve dose coverage and safety,           |

|  |  |  |                           |                                                                                    |                                                         |
|--|--|--|---------------------------|------------------------------------------------------------------------------------|---------------------------------------------------------|
|  |  |  | radiation from<br>imaging | implants due to<br>potential motion<br>artifacts and magnetic<br>field distortions | and 1-year LC ~95%<br>with low Grade3+<br>toxicity (43) |
|--|--|--|---------------------------|------------------------------------------------------------------------------------|---------------------------------------------------------|

MV, megavoltage; CBCT, cone beam CT; PTV, planning target volume; ITV, internal target volume; FBCT, Fan Beam CT; LC, local control.

Table SII. Classification and characteristics of respiratory motion control techniques.

| Techniques            | Technique principle                                                                                       | Clinical applications                                                                                           | Advantages                                                                            | Disadvantages                                                                                           | Contributions                                                                                                        |
|-----------------------|-----------------------------------------------------------------------------------------------------------|-----------------------------------------------------------------------------------------------------------------|---------------------------------------------------------------------------------------|---------------------------------------------------------------------------------------------------------|----------------------------------------------------------------------------------------------------------------------|
| Breath-holding        | The patient inhales deeply or exhales fully and holds their breath (such as Active Breathing Coordinator) | Used in diagnostic imaging (such as CT scans) and short-term radiotherapy to reduce motion artifacts (25,50–52) | Reduces motion artifacts, enhances image quality and improves target delineation      | Requires a high degree of patient cooperation, and certain patients may find it challenging to tolerate | Residual motion $\approx 0$ mm during hold; allows PTV margins of 2-3 mm; and reduces mean lung dose $>20\%$ (50–52) |
| Abdominal compression | Reduces diaphragm motion through abdominal pressure (such as Body Pro-Lok ONE™ Respiratory                | Used for radiotherapy of abdominal or thoracic tumors to stabilize diaphragm motion (53–55)                     | Simple to implement, low equipment requirements and markedly reduces diaphragm motion | Reduces patient comfort and its applicability is limited by the tolerance of the patient                | Reduces motion amplitude by $\sim 50\%$ and permits PTV margin reduction from $\sim 10$ mm to $\sim 6$ mm (53–55)    |

|                          | Belt and Bellyboard)                                                                                                                       |                                                                                                         |                                                                                                          |                                                                        |                                                                                              |
|--------------------------|--------------------------------------------------------------------------------------------------------------------------------------------|---------------------------------------------------------------------------------------------------------|----------------------------------------------------------------------------------------------------------|------------------------------------------------------------------------|----------------------------------------------------------------------------------------------|
| Respiratory gating       | External surrogate (infra-red marker block, spirometer or SGRT) triggers beam-on only during a pre-defined phase window (such as RPM/RGSC) | Used in precise radiotherapy for lung or liver cancers, and synchronized with respiratory cycle (56–60) | Synchronized with patient breathing, reducing the chance of target miss and improving treatment accuracy | Longer treatment time and less effective if the breathing is irregular | Residual motion <5 mm; PTV margin ~5 mm; and lung V20 reduced by 1-2 % vs. ITV plans (56–60) |
| Real-time tumor tracking | Tracks markers or tumor position and dynamically adjusts radiation based on real-time                                                      | Used in advanced radiotherapy for mobile tumors (such as lung cancer or pancreatic cancer)              | High precision, reduces radiation exposure to normal tissues and improves                                | High technical demands and longer treatment time                       | Residual motion 2-3 mm and enables PTV margins of 2-3 mm (61–65)                             |

|  |                                                  |                                         |                                            |  |  |
|--|--------------------------------------------------|-----------------------------------------|--------------------------------------------|--|--|
|  | imaging (such as Synchrony and ExacTrac Dynamic) | and guided by real-time imaging (61–65) | consistency of dose delivery to the target |  |  |
|--|--------------------------------------------------|-----------------------------------------|--------------------------------------------|--|--|

PTV, planning target volume; ITV, internal target volume; SGRT, surface-guided radiotherapy; RPM, real-time positioning management; RGSC, respiratory gating for scanners.

Table SIII. Motion management decision table for lung SBRT based on tumor location, size and respiratory motion amplitude.

| Location                              | Size                    | Motion amplitude<br>(peak-to-peak) | Recommended motion control<br>strategies                                                                                                                                                            | Image guidance modalities (planning and<br>treatment)                                                                                                                                                                                                                                                                              |
|---------------------------------------|-------------------------|------------------------------------|-----------------------------------------------------------------------------------------------------------------------------------------------------------------------------------------------------|------------------------------------------------------------------------------------------------------------------------------------------------------------------------------------------------------------------------------------------------------------------------------------------------------------------------------------|
| Peripheral (away<br>from mediastinum) | Small ( $\leq 3$<br>cm) | Low ( $< 5$ mm)                    | ITV-based planning                                                                                                                                                                                  | 4DCT for ITV generation (or breath-hold CTs<br>for inhale/exhale); and daily kV CBCT for<br>setup verification (using bony anatomy or<br>tumor if visible)                                                                                                                                                                         |
|                                       |                         | Moderate (5-10<br>mm)              | Active motion management<br>recommended: Such as abdominal<br>compression or respiratory gating;<br>if available, real-time tumor<br>tracking; and DIBH is another<br>option if patient can comply. | 4DCT planning with compression device (if<br>used) to assess residual motion; if gating:<br>4DCT to define gating window (such as 30-<br>70% phase), external respiratory sensor (or<br>internal fiducial) for real-time monitoring, and<br>pre-treatment fluoroscopy to verify tumor<br>motion within gating window; if tracking: |

|  |  |               |                                                                                                                                                                                                                                                                                          |                                                                                                                                                                                                                                                                                                                                                                           |
|--|--|---------------|------------------------------------------------------------------------------------------------------------------------------------------------------------------------------------------------------------------------------------------------------------------------------------------|---------------------------------------------------------------------------------------------------------------------------------------------------------------------------------------------------------------------------------------------------------------------------------------------------------------------------------------------------------------------------|
|  |  |               |                                                                                                                                                                                                                                                                                          | <p>Implant fiducial markers, use real-time kV X-ray imaging (such as CyberKnife); daily CBCT for setup (performed at a consistent breathing phase or with compression on); and if DIBH: Planning CT in breath-hold, surface tracking or spirometry for breath-hold reproducibility, and verify with gated CBCT/fluoroscopy at breath-hold.</p>                            |
|  |  | High (>10 mm) | <p>Strong motion mitigation required:<br/> Combine methods if needed.<br/> Respiratory gating (tight gating window at end-exhale) or real-time tracking are first-line to keep motion &lt;5 mm. Use abdominal compression concurrently to reduce baseline motion and increase gating</p> | <p>4DCT simulation to quantify large motion and design strategy. Possibly repeat 4DCT with compression to evaluate improvement; if gating: Narrow gating window (such as 30-50% phase) to minimize residual motion. Used external marker or internal fiducial for gating signal. Verify tumor position in gating window via fluoroscopy. Physicist/therapist monitors</p> |

|            |                 |                    |                                                                                                                                  |                                                                                                                                                                                                                                                                                                                 |
|------------|-----------------|--------------------|----------------------------------------------------------------------------------------------------------------------------------|-----------------------------------------------------------------------------------------------------------------------------------------------------------------------------------------------------------------------------------------------------------------------------------------------------------------|
|            |                 |                    | <p>efficiency. If patient can do breath-hold, treat in repeated DIBH cycles as an alternative (complete motion elimination).</p> | <p>real-time trace during treatment; if tracking: Fiducials + continuous kV imaging throughout treatment (such as 30-60 sec interval imaging in robotic tracking); daily CBCT (or 4D-CBCT) for initial setup. Intrafraction monitoring via surface camera (for DIBH) or cine imaging (for gating/tracking).</p> |
| Peripheral | Medium (3-5 mm) | Low (<5 mm)        | <p>ITV-based planning (4DCT-derived ITV) without gating. Ensure robust setup alignment given tumor size.</p>                     | <p>4DCT for ITV. Consider mid-ventilation planning as an alternative (average tumor position with margin); and daily CBCT for setup. Use tumor matching if visible, or anatomical surrogate if not.</p>                                                                                                         |
|            |                 | Moderate (5-10 mm) | <p>Active management (similar to small tumor): Compression or Gating to shrink motion envelope; consider DIBH or tracking if</p> | <p>4DCT to delineate motion range. Test compression efficacy; gating setup with external surrogate and 4DCT phases if used. CBCT with gating or breath-hold technique for</p>                                                                                                                                   |

|            |               |               |                                                                                                                                                                                                                                                                              |                                                                                                                                                                                                                                                              |
|------------|---------------|---------------|------------------------------------------------------------------------------------------------------------------------------------------------------------------------------------------------------------------------------------------------------------------------------|--------------------------------------------------------------------------------------------------------------------------------------------------------------------------------------------------------------------------------------------------------------|
|            |               |               | appropriate. Combination approaches (compression + gating) can be utilized.                                                                                                                                                                                                  | alignment; and fiducial placement for tracking if standard IGRT is challenging (large tumors may obscure visualization).                                                                                                                                     |
|            |               | High (>10 mm) | <b>Aggressive motion control: Gating or tracking</b> strongly indicated (to avoid $\geq 1$ cm extra margin). Use <b>compression</b> to assist. <b>DIBH</b> if feasible. If none of these are possible, consider treating with alternative fractionation (beyond SBRT scope). | Same as peripheral small/high-motion: Thorough 4DCT evaluation. Employ gating with verification, or tracking with fiducials; and use multiple image guidance tools: 4D-CBCT or repeated CBCT mid-treatment to ensure no shift, given large motion potential. |
| Peripheral | Large (>5 cm) | Low (<5 mm)   | <b>ITV or gated</b> plan (depending on proximity to OARs). Large tumors have less relative benefit from gating if motion is minimal, but if near chest wall, one might gate to                                                                                               | 4DCT for ITV; CBCT for setup. Consider <b>fiducials</b> if tumor has poor image contrast (some large tumors cause atelectasis making edges unclear on x-ray); and if gating chosen                                                                           |

|  |  |                           |                                                                                                                                                                                                                                                                                                                                                                                                            |                                                                                                                                                                                                                                                                                                                                                          |
|--|--|---------------------------|------------------------------------------------------------------------------------------------------------------------------------------------------------------------------------------------------------------------------------------------------------------------------------------------------------------------------------------------------------------------------------------------------------|----------------------------------------------------------------------------------------------------------------------------------------------------------------------------------------------------------------------------------------------------------------------------------------------------------------------------------------------------------|
|  |  |                           | <p>reduce chest wall dose. Generally, <b>ITV-based</b> approach with 4DCT is acceptable if &lt;5 mm motion.</p>                                                                                                                                                                                                                                                                                            | <p>(such as to spare critical normal tissue), implement the aforementioned method.</p>                                                                                                                                                                                                                                                                   |
|  |  | <p>Moderate (5-10 mm)</p> | <p>Active management required: Prefer respiratory gating (to minimize margin for this large target) or DIBH (which also expands lungs, potentially reducing dose to lung/heart). Compression may be less effective for upper lobe tumors (common for large central tumors), but can be tried for a lower-lobe lesion. Tracking is generally not favored for very large tumors (due to complexity), but</p> | <p>4DCT to guide gating or breath-hold planning. Possibly plan on a gated mid-position CT or inhale/exhale breath-hold CTs.; use image guidance focusing on nearby OAR positions (such as ensure tumor clearance from mediastinal structures on gated CBCT); and monitor intrafraction with surface tracking (for DIBH) or fluoroscopy (for gating).</p> |

|  |  |               |                                                                                                                                                                                                                                                                                                                                                                                                                                                                                                           |                                                                                                                                                                                                                                                                                                                                                                                                                                                                                             |
|--|--|---------------|-----------------------------------------------------------------------------------------------------------------------------------------------------------------------------------------------------------------------------------------------------------------------------------------------------------------------------------------------------------------------------------------------------------------------------------------------------------------------------------------------------------|---------------------------------------------------------------------------------------------------------------------------------------------------------------------------------------------------------------------------------------------------------------------------------------------------------------------------------------------------------------------------------------------------------------------------------------------------------------------------------------------|
|  |  |               | could be attempted with multiple fiducials.                                                                                                                                                                                                                                                                                                                                                                                                                                                               |                                                                                                                                                                                                                                                                                                                                                                                                                                                                                             |
|  |  | High (>10 mm) | <p><b>Maximum intervention: Gating and/or DIBH</b> nearly mandatory for safe treatment. Aim to treat in a phase or breath-hold where tumor motion is minimized. Consider partial <b>ITV + gating hybrid</b> (such as gating to cover most motion but accept a certain residual if needed with slightly enlarged ITV).</p> <p><b>Tracking</b> with fiducials could be considered in extreme cases, but large tumor motion may also involve deformation. Multi-fraction (hyperfractionated SBRT) may be</p> | <p>Comprehensive 4D imaging and possibly fluoroscopic simulation to understand motion trajectory; strongly consider DIBH CT simulation and treatment, especially if the tumor is central (to reduce proximity to organs); gating: Use the smallest effective window and verify extensively that the tumor stays in field (such as intrafraction cine imaging); and employ all relevant IGRT: For example, soft-tissue matching on CBCT and fiducial-based alignment if markers present.</p> |

|                                  |                      |                    |                                                                                                                                                                                                                                                                                                                                     |                                                                                                                                                                                                                                                                                                                                                                         |
|----------------------------------|----------------------|--------------------|-------------------------------------------------------------------------------------------------------------------------------------------------------------------------------------------------------------------------------------------------------------------------------------------------------------------------------------|-------------------------------------------------------------------------------------------------------------------------------------------------------------------------------------------------------------------------------------------------------------------------------------------------------------------------------------------------------------------------|
|                                  |                      |                    | considered to mitigate risk (per institutional protocol).                                                                                                                                                                                                                                                                           |                                                                                                                                                                                                                                                                                                                                                                         |
| Central (near hilum/mediastinum) | Small ( $\leq 3$ cm) | Low ( $< 5$ mm)    | <p><b>ITV-based planning</b> (4DCT) is acceptable <b>if</b> critical organs can be spared with normal margins. However, consider <b>gating or breath-hold</b> even for small motion if tumor is very close to OARs (to tighten the margin). Use careful image guidance (tumor may be less visible amid mediastinal structures).</p> | <p>4DCT for ITV; consider obtaining breath-hold CTs to evaluate tumor position relative to heart/mediastinum in inhale vs exhale; daily CBCT (soft-tissue window) for setup; <b>fiducial markers</b> may be placed in or near tumor to aid localization if the tumor is hard to visualize; and if gating/breath-hold used electively, follow those IGRT procedures.</p> |
|                                  |                      | Moderate (5-10 mm) | <p><b>Respiratory gating</b> (preferred) or <b>DIBH</b> to restrict motion and shrink margins around tumor and adjacent OARs. <b>ITV alone is not ideal</b> due</p>                                                                                                                                                                 | <p>4DCT to quantify motion and plan gated or breath-hold strategy. Possibly use mid-ventilation or gating-phase imaging for planning.; if gating, use an external respiratory</p>                                                                                                                                                                                       |

|  |  |               |                                                                                                                                                                                                                                                                                                                                     |                                                                                                                                                                                                                                                                                                                                                                                                                        |
|--|--|---------------|-------------------------------------------------------------------------------------------------------------------------------------------------------------------------------------------------------------------------------------------------------------------------------------------------------------------------------------|------------------------------------------------------------------------------------------------------------------------------------------------------------------------------------------------------------------------------------------------------------------------------------------------------------------------------------------------------------------------------------------------------------------------|
|  |  |               | <p>to proximity of critical structures:</p> <p>Active management is recommended to keep the high-dose region tight. Abdominal compression may be of limited benefit unless the tumor is lower-central, but it can be attempted.</p>                                                                                                 | <p>signal and verify tumor-OAR geometry in gating window via imaging (such as tumor distance from carina on exhale CBCT).; and if DIBH, ensure breath-hold reproducibility with visual coaching or surface tracking, and use gated imaging to verify tumor position each hold.</p>                                                                                                                                     |
|  |  | High (>10 mm) | <p><b>Maximum motion management</b> is crucial. <b>DIBH</b> is often recommended for central tumors with large motion, as deep inspiration inflates the lungs and distances critical structures.</p> <p>Alternatively, use <b>tight gating</b> on the phase where the tumor is least mobile (often end-exhale). <b>Fiducial</b></p> | <p>4DCT and/or breath-hold CT for planning. If using DIBH, the patient must practice breath-holds, and real-time spirometry or surface monitoring should be used; if gating, possibly combine with abdominal compression if the tumor is near the diaphragm, to reduce motion amplitude. Use real-time imaging (fluoro) during initial treatments to confirm tumor stays in gated field; use IGRT with emphasis on</p> |

|         |                    |                    |                                                                                                                                                                                                                                                                           |                                                                                                                                                                                                                                                                                                                                     |
|---------|--------------------|--------------------|---------------------------------------------------------------------------------------------------------------------------------------------------------------------------------------------------------------------------------------------------------------------------|-------------------------------------------------------------------------------------------------------------------------------------------------------------------------------------------------------------------------------------------------------------------------------------------------------------------------------------|
|         |                    |                    | <p><b>tracking</b> can be considered if gating/breath-hold are infeasible, but implanting markers in central locations carries risk.</p>                                                                                                                                  | <p>avoiding OARs: For example, verify the heart/bronchus positions relative to the target in the planned gated phase via imaging. Possibly utilize 4D-CBCT to assess motion each session.</p>                                                                                                                                       |
| Central | Medium<br>(3-5 cm) | Low (<5 mm)        | <p><b>Consider gated or breath-hold approach</b> even if motion is low, due to size and location. An <i>ITV approach</i> is possible if OAR doses meet constraints, but central medium tumors often abut structures, so reducing any margin via gating is beneficial.</p> | <p>4DCT ITV plus tight PTV margin if no gating (as the tumor is larger, the margin needs careful evaluation); strongly consider planning a gated or DIBH variant for comparison; and use IGRT with soft-tissue matching, considering interfraction imaging of tumor/OAR position over the course (to ensure no baseline shift).</p> |
|         |                    | Moderate (5-10 mm) | <p><b>Mandatory motion management: Gating or DIBH</b> (preferred) to control motion. ITV-alone is not</p>                                                                                                                                                                 | <p>Plan with 4DCT and gating or breath-hold, and ensure the chosen method reliably yields &lt;5 mm residual motion; use high-quality imaging</p>                                                                                                                                                                                    |

|  |  |               |                                                                                                                                                                                                                                                                                                                                                         |                                                                                                                                                                                                                                                                                                                                                                                                                                                        |
|--|--|---------------|---------------------------------------------------------------------------------------------------------------------------------------------------------------------------------------------------------------------------------------------------------------------------------------------------------------------------------------------------------|--------------------------------------------------------------------------------------------------------------------------------------------------------------------------------------------------------------------------------------------------------------------------------------------------------------------------------------------------------------------------------------------------------------------------------------------------------|
|  |  |               | <p>appropriate as it would substantially increase dose to critical central structures. Follow <i>guidelines (TG-76)</i> to use motion management &gt;5 mm.</p>                                                                                                                                                                                          | <p>for setup, verifying the tumor position at the gated phase each fraction (such as using 4D CBCT or a cine verify); and if the tumor moves into mediastinum at certain phases, time the beam-off accordingly.</p>                                                                                                                                                                                                                                    |
|  |  | High (>10 mm) | <p><b>Comprehensive approach: DIBH</b> is ideal (stop motion and maximize lung volume) if possible; otherwise <b>exhale gating</b> with as small a window as feasible. Multiple techniques may be combined (such as compression to steady the diaphragm plus gating). If these fail, reevaluate treatment approach (consider more fractions or even</p> | <p>Likely obtain both a 4DCT and an inhale breath-hold CT to decide which gives best geometry (sometimes inhale hold pulls tumor away from critical structures); use all available monitoring: For example, surface tracking for breath-hold and continuous fluoro for gatin, to ensure the tumor stays within the planned margin throughout treatment; and have a low threshold to pause treatment if breathing deviates; reproducibility is key.</p> |

|  |  |  |                                             |  |
|--|--|--|---------------------------------------------|--|
|  |  |  | internal fixation, though<br>experimental). |  |
|--|--|--|---------------------------------------------|--|
